# Supplementary material for: Mesoscale weather systems and associated potential wind power variations in a midlatitude sea strait (Kattegat)
Source: Copernicus journal article supplement (doi:10.5194/wes-9-1695-2024), 2024-08-15
Supplement: Supplementary file [file wes-9-1695-2024-supplement-title-page.pdf › wes-9-1695-2024-supplement-title-page.pdf]

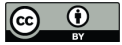

*Supplement of*

## **Mesoscale weather systems and associated potential wind power variations in a midlatitude sea strait (Kattegat)**

**Jérôme Neiryndck et al.**

*Correspondence to:* Jérôme Neiryndck ([jerome.neiryndck@kuleuven.be](mailto:jerome.neiryndck@kuleuven.be))

- [wes-9-1695-2024-supplement-title-page.pdf](#)
- [supplementary\\_1.gif](#)
- [supplementary\\_2.gif](#)

The copyright of individual parts of the supplement might differ from the article licence.
